# Supplementary material for: Honeycomb-layer structured Na3Ni2BiO6 as a high voltage and long life cathode material for sodium-ion batteries
Source: Royal Society of Chemistry journal article supplement (doi:10.1039/c6ta08661f), 2016-12-12
Supplement: c6ta08661f1.pdf [file c6ta08661f1.pdf]

**Electronic Supplementary Material (ESI) for Journal of Materials Chemistry A.**

Electronic Supplementary Information

**Honeycomb-layer structured  $\text{Na}_3\text{Ni}_2\text{BiO}_6$  as a high voltage and long life cathode material for sodium-ion batteries**

Deu S. Bhang, <sup>a,b,‡</sup> Ghulam Ali, <sup>c,d,‡</sup> Dong-Hyun Kim, <sup>c</sup> Daniel A. Anang, <sup>a</sup> Tae Joo Shin, <sup>e</sup> Min-Gyu Kim, <sup>f</sup> Yong-Mook Kang<sup>a</sup>, Kyung-Yoon Chung<sup>c,d\*</sup> and Kyung-Wan Nam<sup>a\*</sup>

<sup>a</sup> *Department of Energy and Materials Engineering, Dongguk University-Seoul, 04620 Seoul, Republic of Korea, Email: [knam@dongguk.edu](mailto:knam@dongguk.edu)*

<sup>b</sup> *Department of Chemistry, Shivaji University, Kolhapur 416004, India*

<sup>c</sup> *Center for Energy Convergence Research, Korea Institute of Science and Technology, Seoul 02792, Republic of Korea, E-mail: [kychung@kist.re.kr](mailto:kychung@kist.re.kr)*

<sup>d</sup> *Korea University of Science and Technology, 217 Gajeong-ro, Yuseong-gu, Daejeon 34113, Republic of Korea*

<sup>e</sup> *UNIST Central Research Facilities & School of Natural Science, Ulsan National Institute of Science and Technology (UNIST), Ulsan 44919, Republic of Korea*

<sup>f</sup> *Pohang Accelerator Laboratory (PAL), Pohang 790-784, Republic of Korea*

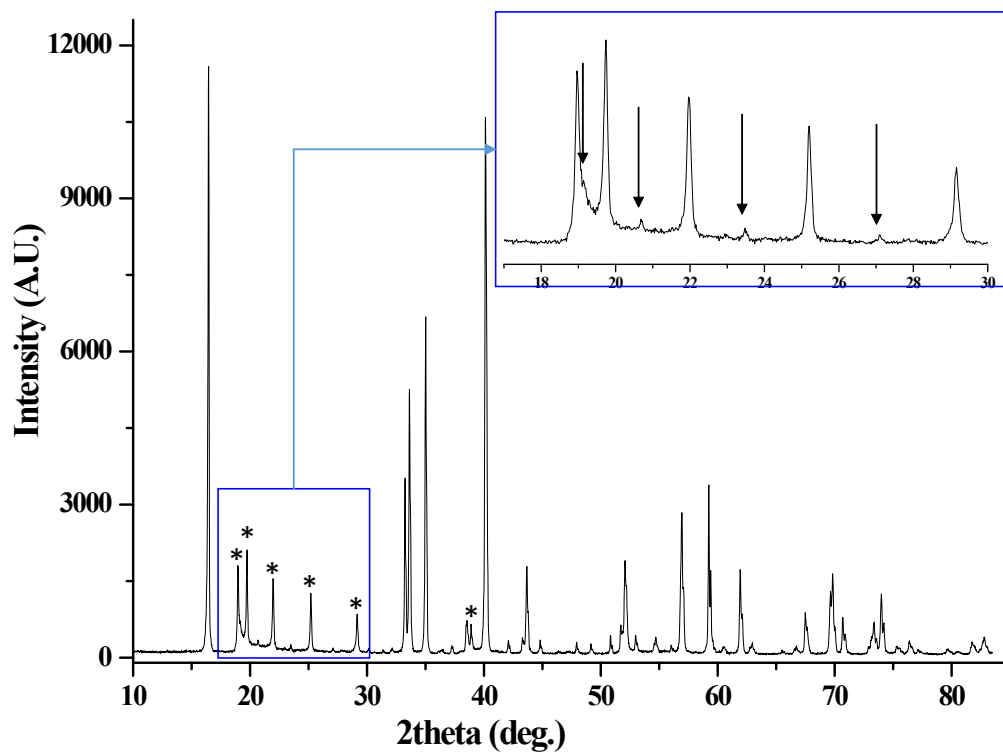

**Fig. S1** Laboratory powder XRD pattern ( $\lambda=1.5406\text{\AA}$ ) of  $\text{Na}_3\text{Ni}_2\text{BiO}_6$  prepared in this study using solid-state reaction. Asterisk marks are used to highlight the super-structure reflections. Inset shows the expanded view in the  $2\theta$  region between 17 and  $30^\circ$  to better represent additional weak reflections (marked by arrows) due to  $C2/c$  symmetry ( $\lambda=1.5406\text{ \AA}$ ).

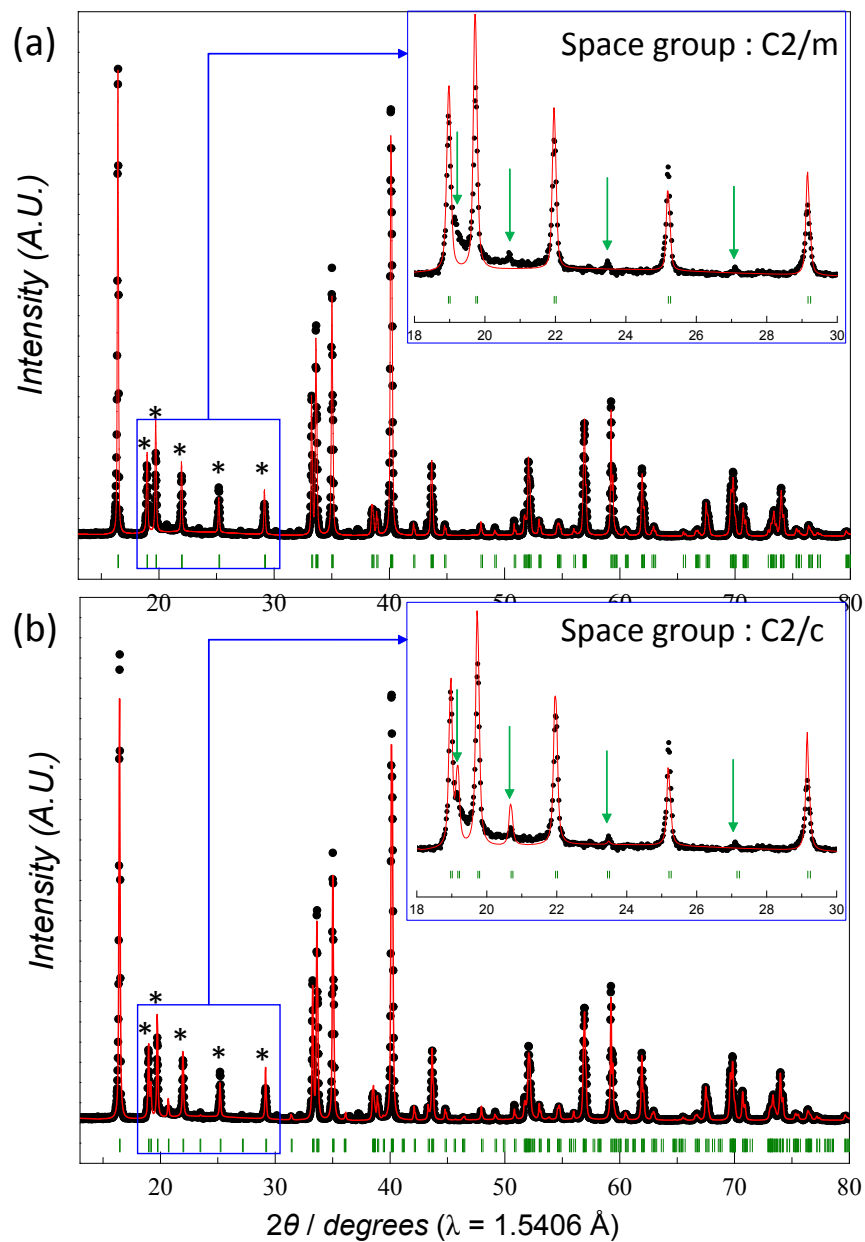

**Fig. S2** Le Bail fit of the Laboratory XRD pattern with (a)  $C2/m$  and (b)  $C2/c$  symmetry for the  $\text{Na}_3\text{Ni}_2\text{BiO}_6$ . Insets show the expanded view of the super-structure peaks in the  $2\theta$  range between 17 to  $30^\circ$  to show the presence of weakly intense reflections (marked by green arrows).

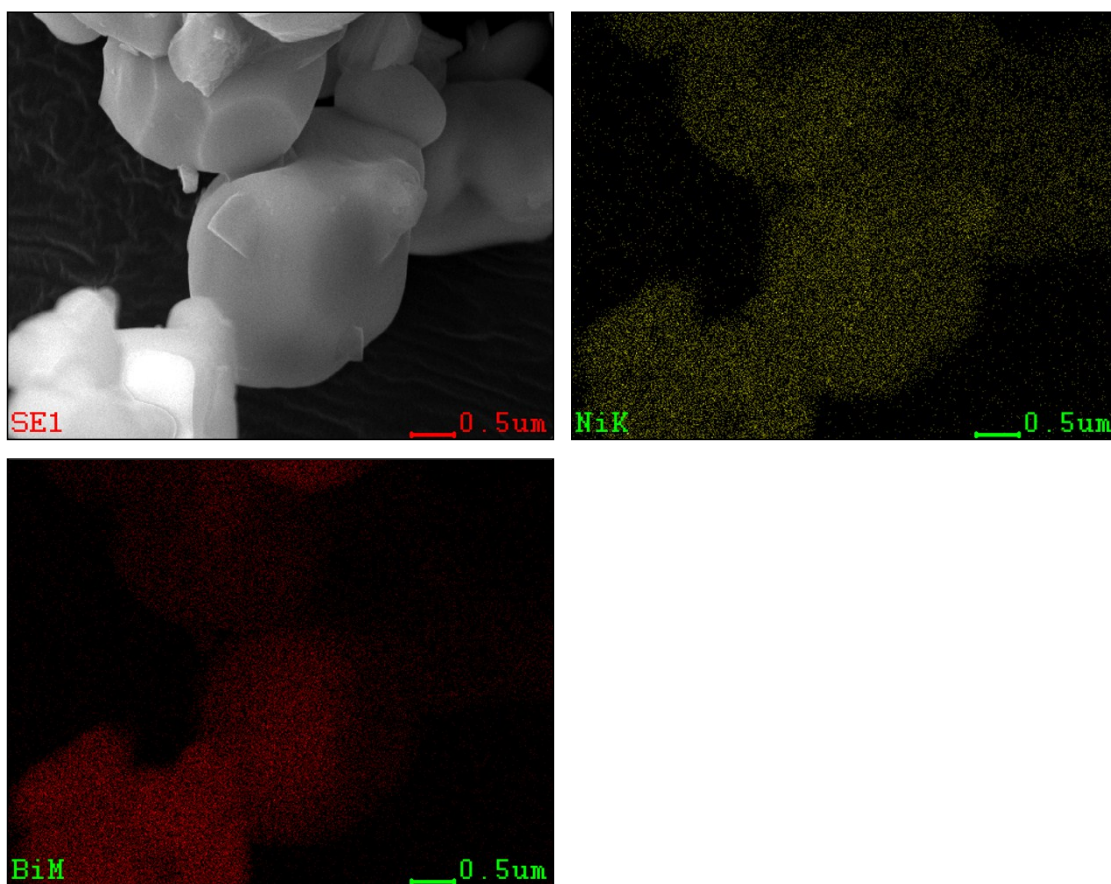

**Fig. S3** Elemental mapping of the Ni and Bi throughout the sample of  $\text{Na}_3\text{Ni}_2\text{BiO}_6$  using characteristic X-rays.

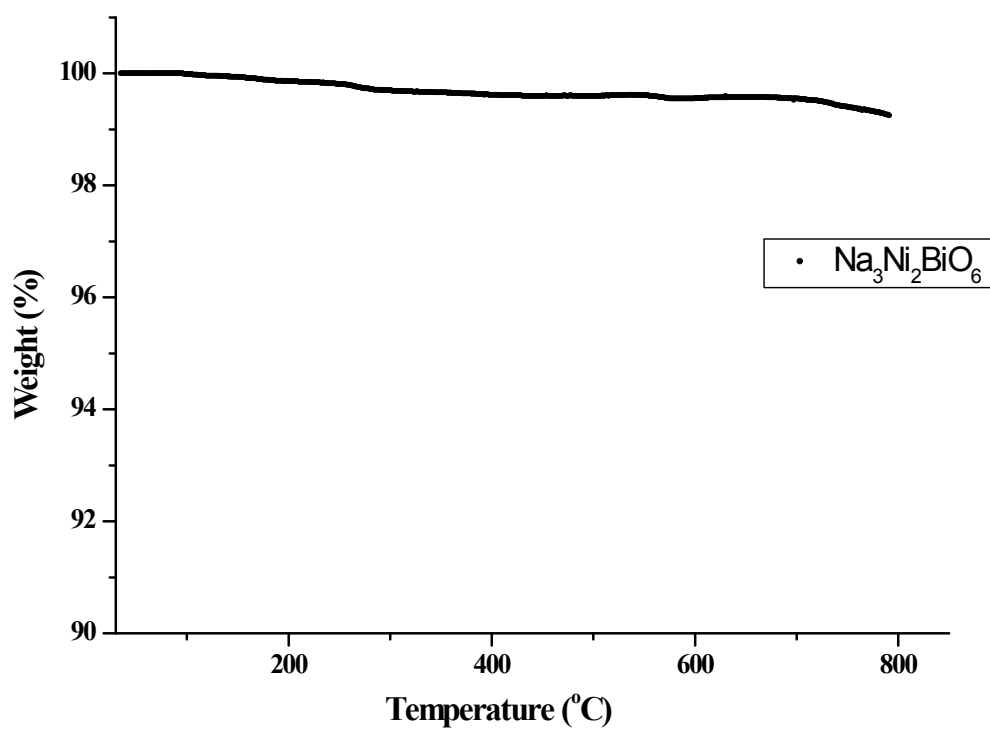

**Fig. S4** TGA curve of the Na<sub>3</sub>Ni<sub>2</sub>BiO<sub>6</sub> powder exposed to ambient air atmosphere.

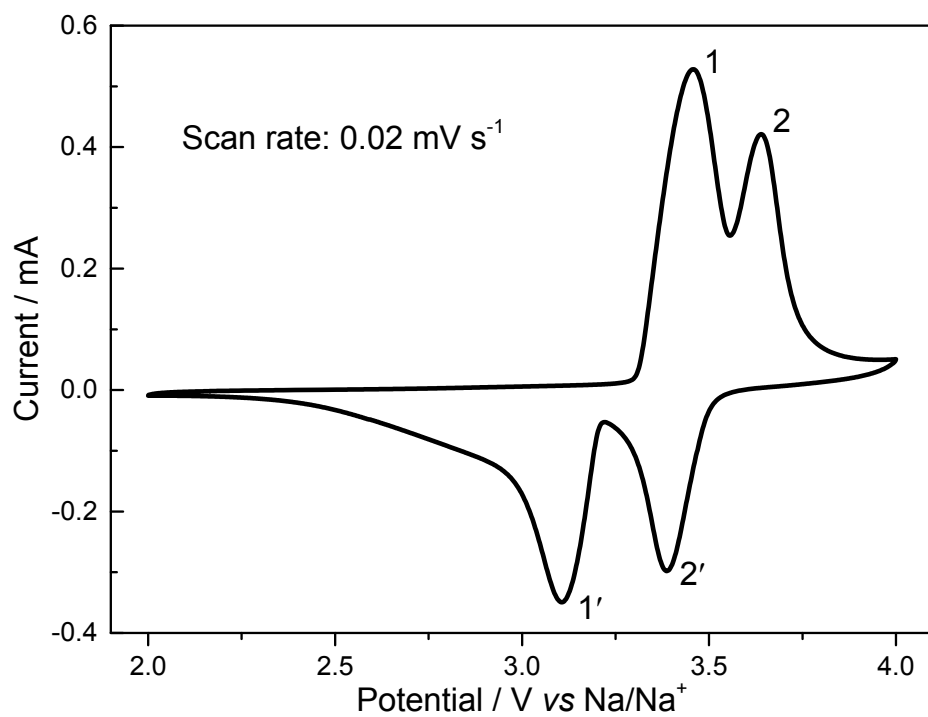

**Fig. S5** Cyclic voltammogram (CV) profile of the Na<sub>3</sub>Ni<sub>2</sub>BiO<sub>6</sub> electrode at a scan rate of 0.02 mV s<sup>-1</sup>.

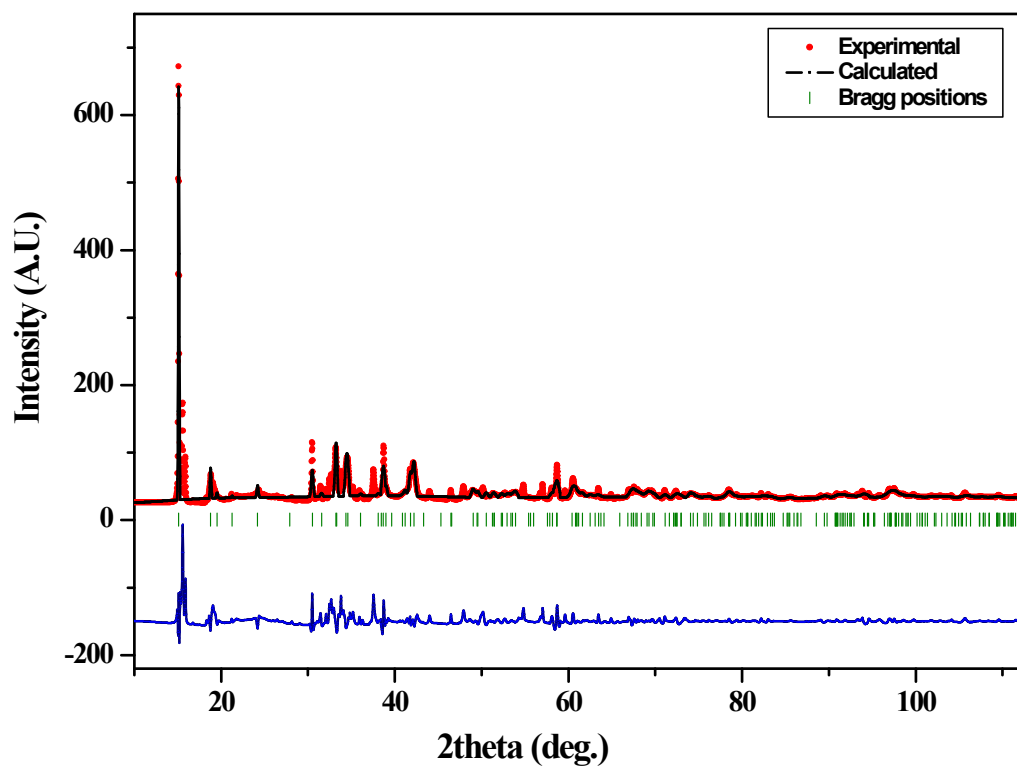

**Fig. S6** Le Bail fit for the intermediate charged (3.4V)  $\text{Na}_3\text{Ni}_2\text{BiO}_6$ , equivalent to extraction of 1 Na ion from the structure (composition corresponding to  $\text{Na}_2\text{Ni}_2\text{BiO}_6$ ).

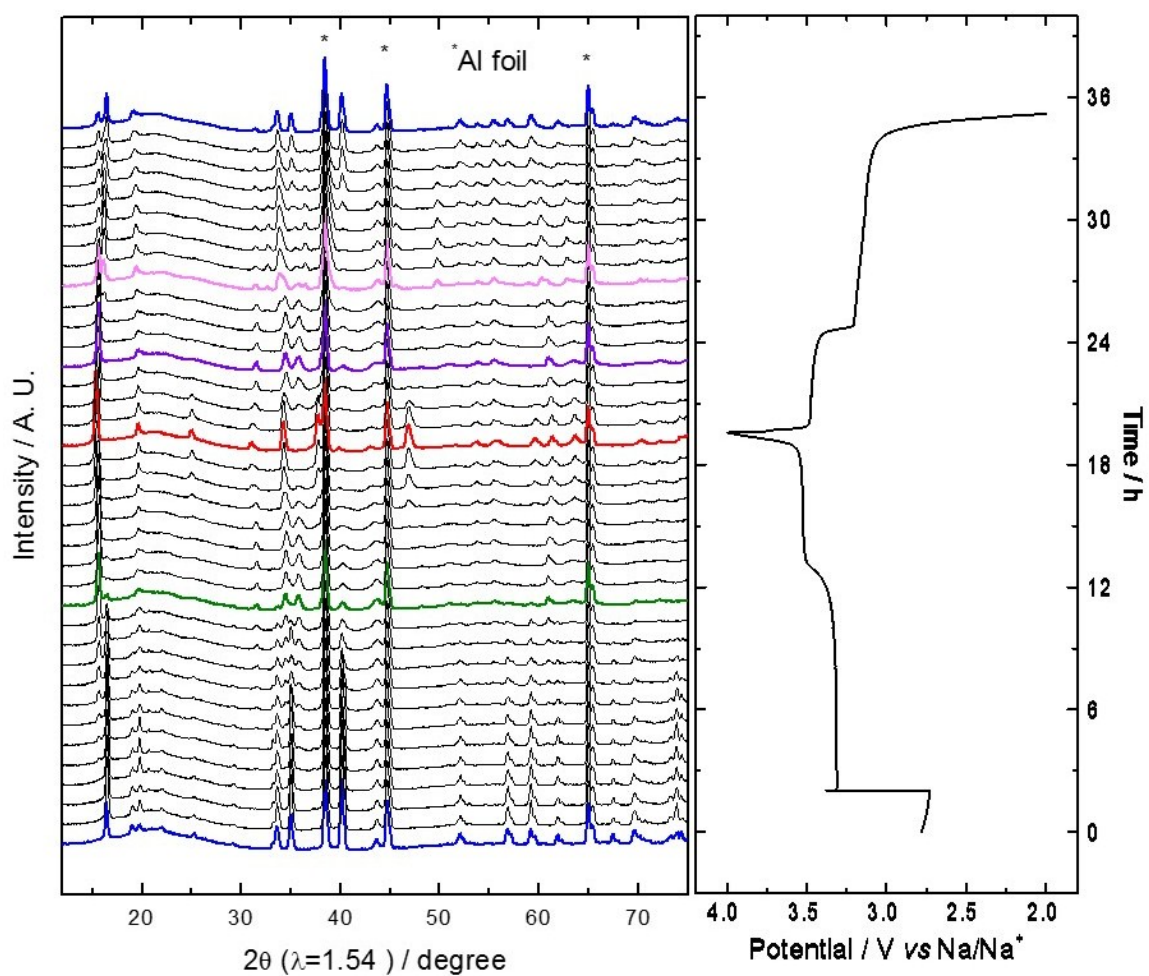

**Fig. S7** (Left) In situ X-ray powder diffraction patterns collected during charging discharging of the  $\text{Na}_3\text{Ni}_2\text{BiO}_6$  in the voltage of 2.0 to 4.0V. (Right) The electrochemical profile of a cell, as a function of Na content recorded during diffraction experiment. The reflection from the Al foil used for casting the electrode are marked by asterisks (\*).



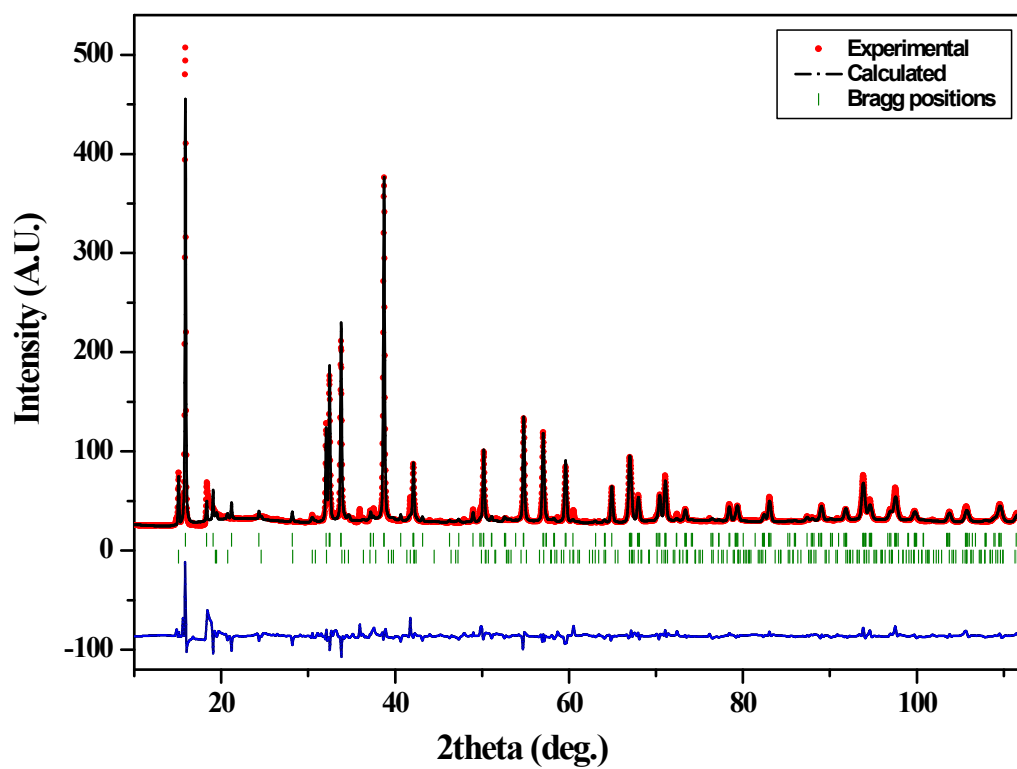

**Fig. S8** Rietveld plot for the fully discharged (2V) electrode powder corresponding to chemical composition Na<sub>3</sub>Ni<sub>2</sub>BiO<sub>6</sub>.

**Table S1.** Selected bond distances (Å) for Na<sub>3</sub>Ni<sub>2</sub>BiO<sub>6</sub> (C2/c space group).

| M-O           | Bond length (Å) |
|---------------|-----------------|
| Na1 – O1 (x2) | 2.401 (15)      |
| Na1 – O2 (x2) | 2.325 (11)      |
| Na1 – O3 (x2) | 2.435 (14)      |
| Na2 – O1 (x2) | 2.44 (2)        |
| Na2 – O2 (x2) | 2.40 (2)        |
| Na2 – O3 (x2) | 2.365 (4)       |
| Na3 – O1 (x2) | 2.461 (10)      |
| Na3 – O2 (x2) | 2.419 (15)      |
| Na3 – O3 (x2) | 2.325 (11)      |
| <hr/>         |                 |
| Ni-O1         | 2.101 (5)       |
| Ni-O1         | 2.114 (5)       |
| Ni-O2         | 2.104 (5)       |
| Ni-O2         | 2.108 (5)       |
| Ni-O3         | 2.101 (5)       |
| Ni-O3         | 2.102 (5)       |
| <hr/>         |                 |
| Bi-O1         | 2.146 (3)       |
| Bi-O2         | 2.146 (3)       |
| Bi-O3         | 2.145 (3)       |

**Table S2.** Crystallographic data and atomic coordinates of the  $\text{Na}_3\text{Ni}_2\text{BiO}_6$  (P-31 m space group) based on Rietveld refinement of synchrotron powder XRD data.

| O1- $\text{NaNi}_2\text{BiO}_6$                            |              | Space group: P-31 m |        |        |           |                  |
|------------------------------------------------------------|--------------|---------------------|--------|--------|-----------|------------------|
| a=5.2242 (1) Å, c=5.7506 (1) Å, V=135.9 (1) Å <sup>3</sup> |              |                     |        |        |           |                  |
| Atom                                                       | multiplicity | x                   | y      | z      | occupancy | U <sub>iso</sub> |
| Bi1                                                        | 1            | 0                   | 0      | 0      | 1         | 0.0064           |
| Ni1                                                        | 2            | 0.3333              | 0.6667 | 0      | 1         | 0.0064           |
| O1                                                         | 6            | 0.3525              | 0      | 0.1795 | 1.0       | 0.014            |
| Na3                                                        | 2            | 0.3333              | 0.6667 | 0.5    | 0.5       | 0.016            |

Agreement factors: R<sub>w</sub>p=8.00%, R<sub>p</sub>=5.18%, R<sub>F</sub><sup>2</sup>= 10.98%

**Table S3.** Selected bond distances (Å) for  $\text{NaNi}_2\text{BiO}_6$  (P-31 m space group).

| M-O       | Bond length (Å) |
|-----------|-----------------|
| Bi1 – O1  | 2.111 (1)       |
| Ni1 – O1  | 1.983 (1)       |
| Na1 – O1  | 2.503 (2)       |
| Na2 – O1  | 2.44 (2)        |
| Ni1 – Ni1 | 3.016 (1)       |

**Table S4.** Crystallographic data and atomic coordinates of the discharged phase of  $\text{Na}_3\text{Ni}_2\text{BiO}_6$  (C2/m space group) based on Rietveld refinement of ex-situ synchrotron powder XRD data.

| O3- $\text{Na}_3\text{Ni}_2\text{BiO}_6$                                                          |              | Space group: C2/m |        |        |        |
|---------------------------------------------------------------------------------------------------|--------------|-------------------|--------|--------|--------|
| a=5.3961(3) Å, b=9.3285(6) Å, c=5.6710(2) Å, $\beta=108.493(6)^\circ$ V=270.73 (1) Å <sup>3</sup> |              |                   |        |        |        |
| Atom                                                                                              | Multiplicity | x                 | y      | z      | Uiso   |
| Bi                                                                                                | 2            | 0                 | 0      | 0      | 0.0056 |
| Ni                                                                                                | 4            | 0                 | 0.6666 | 0      | 0.0056 |
| O1                                                                                                | 8            | 0.2299            | 0.8333 | 0.1972 | 0.0065 |
| O2                                                                                                | 4            | 0.2300            | 0.5    | 0.2067 | 0.0065 |
| Na1                                                                                               | 2            | 0                 | 0.5    | 0.5    | 0.006  |
| Na2                                                                                               | 4            | 0.5               | 0.3556 | 0.5    | 0.006  |

Agreement factors: Rwp=6.79%, Rp=4.07%,  $R_F^2=11.40\%$ ,

**Table S5.** Transformed lattice parameters of the  $\text{Na}_3\text{Ni}_2\text{BiO}_6$  (pristine),  $\text{Na}_2\text{Ni}_2\text{BiO}_6$  (3.4V phase) and  $\text{Na}_3\text{Ni}_2\text{BiO}_6$  (at fully discharge state) in the pseudohexagonal symmetry and  $\text{NaNi}_2\text{BiO}_6$  (4V phase) in hexagonal symmetry.

| Lattice constants          | $\text{Na}_3\text{Ni}_2\text{BiO}_6$ (pristine) | $\text{Na}_2\text{Ni}_2\text{BiO}_6$ (3.4 V) | $\text{NaNi}_2\text{BiO}_6$ (4 V) | $\text{Na}_3\text{Ni}_2\text{BiO}_6$ (discharged) |
|----------------------------|-------------------------------------------------|----------------------------------------------|-----------------------------------|---------------------------------------------------|
| a (Å)                      | 5.4012                                          | 5.2533                                       | 5.2242                            | 5.3961                                            |
| b (Å)                      | 5.4008                                          | 5.2695                                       | 5.2242                            | 5.3858                                            |
| c (Å)                      | 5.3873                                          | 5.6509                                       | 5.7506                            | 5.3782                                            |
| $\sim V$ (Å <sup>3</sup> ) | 136.09                                          | 135.47                                       | 135.92                            | 135.36                                            |

$a_{\text{mono}}=a_{\text{hex}}$ ;  $b_{\text{mono}}=(3)^{1/2}(a_{\text{hex}})$ ;  $c_{\text{mono}}=c_{\text{hex}}/(\sin(180-\beta))$ .  $\sim V=(abc)*\sin 60$

**Detailed EXAFS fitting procedures;**

The extracted EXAFS signal,  $\chi(k)$ , was weighted by  $k^2$  to emphasize the high-energy oscillations, and then Fourier-transformed in  $k$ -ranges of 3.0 ~ 13.0  $\text{\AA}^{-1}$  for Ni and 3.5 ~ 13.5  $\text{\AA}^{-1}$  for Bi, using a Hanning window function to obtain the magnitude plots of the EXAFS spectra in R-space ( $\text{\AA}$ ). Least-square fitting of the EXAFS spectra was performed using theoretically generated scattering paths based on the model structures. For the pristine  $\text{Na}_3\text{Ni}_2\text{BiO}_6$  material, more averaged structure of C2/m space group was used instead of the structure with space group of C2/c to reduce the fitting variables. For the halfway charged ( $\text{Na}_2\text{Ni}_2\text{BiO}_6$  with C2/m space group) and fully charged ( $\text{NaNi}_2\text{BiO}_6$  with P-31 m space group) materials, the model structures obtained from the Rietveld refinements were used. The amplitude reduction factor ( $S_0^2$ ) was determined to be 0.81 for Ni K-edge and 0.9 for Bi L<sub>3</sub>-edge from the preliminary fitting sessions, and then fixed during the final fitting. Only single scattering path was considered during the fitting of all spectra.

## 1) Ni K-edge EXAFS

The filtered FTs of the EXAFS spectra in a R range of 1.1 ~ 3.1  $\text{\AA}$  covering the first Ni-O and second Ni-M shells were fitted. The coordination numbers are fixed as determined from the model structure except for the first Ni-O shell with the halfway charged and fully charged states to take the Jahn-Teller distortion effect into account. The same inner shell potential shift ( $\Delta E$ ) was shared for all of the paths while the separate fitting parameters of the bond distance (R) and Debye-Waller factor (i.e., mean square disorder,  $\sigma^2$ ) were used for each shell. In order to reduce the fitting variables, averaged Ni-O<sub>6</sub> bond length and single  $\sigma^2$  were employed of the first Ni-O shell, which results in acceptable fitting quality. In case of the halfway- and fully- charged states, two Ni-O shells with varying coordination numbers were considered to take Jahn-Teller distortion effect into account while the sum of the coordination numbers constrained to be 6.

## 2) Bi L<sub>3</sub>-edge EXAFS

The filtered FTs of the EXAFS spectra in a R range of 1.1 ~ 3.1 Å covering the first Bi-O and second Bi-Ni shells were fitted. The coordination numbers are fixed as determined from the model structure used. The same inner shell potential shift ( $\Delta E$ ) was shared for all of the paths while the separate fitting parameters of the bond distance (R) and Debye-Waller factor (i.e., mean square disorder,  $\sigma^2$ ) were used for each shell.
